# Supplementary material for: Determination of Sulfites in Dried Fruits by Paper Spray Ionization Tandem Mass Spectrometry
Source: MDPI journal article supplement (doi:10.3390/molecules29102192), 2024-05-08
Supplement: s1 [file s1]

Supporting Information

## **Determination of sulfites in dried fruits by paper spray ionization tandem mass spectrometry**

Donghoon Lee <sup>1</sup>, Heejin Ro <sup>1</sup>, Seoyoung Hwang <sup>1</sup>, Minkyu Lee <sup>1</sup>, Hyebeen Kim <sup>1</sup>, Jaeyoung Heo <sup>1</sup>, and Sangwon Cha <sup>1,\*</sup>

<sup>1</sup>Department of Chemistry, Dongguk University, Seoul 04620, Republic of Korea; chasw@dongguk.edu

\*Correspondence: chasw@dongguk.edu; Tel.: +82-2-2260-8907 (S.C.)

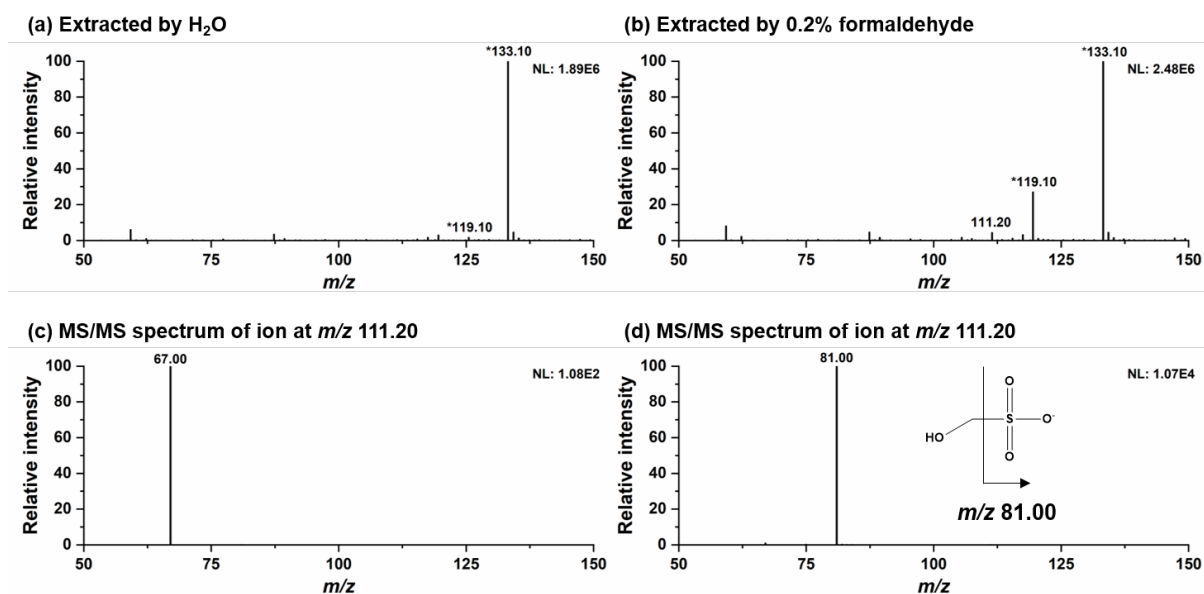

**Figure S1.** (a and b) PSI mass spectra of dried apricot extracts. Extraction was performed with (a) H<sub>2</sub>O as a control and (b) 0.2% formaldehyde solution. It should be noted that an ion signal from hydroxymethyl sulfonate (HMS) was detected at  $m/z$  111.20 with 0.2% formaldehyde solution (b), whereas any signal from HMS was not detected in the control (a). (c and d) Product ion spectra (MS/MS spectra) for the ion at  $m/z$  111.20 from dried apricot extracts using (c) H<sub>2</sub>O and (d) 0.2% formaldehyde solution. It should be also noted that a characteristic fragment ion at  $m/z$  81.00 was detected only from a sample extracted with 0.2% formaldehyde (d). Full mass spectra and MS/MS spectra were collected using a linear ion trap mass spectrometer (Thermo Finnigan LTQ XL, Mountain View, CA, USA). NL denotes normalized level.

(a) LC-MS/MS

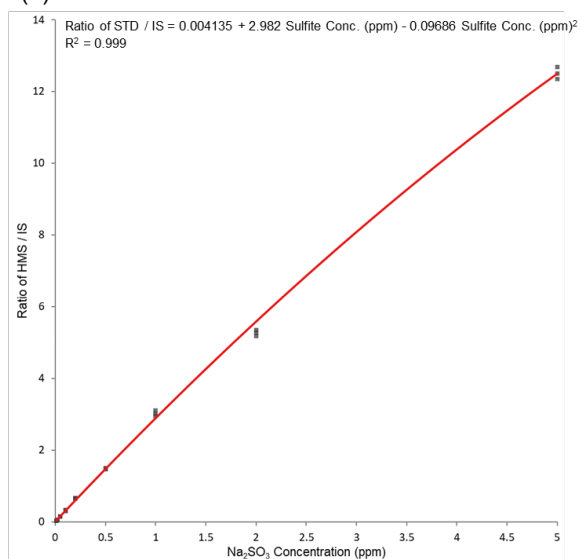

(b) PSI-MS/MS

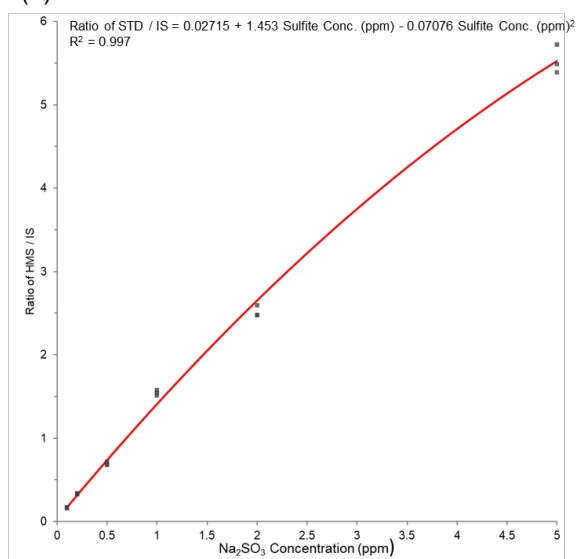

**Figure S2.** Calibration curves constructed for investigating average percent recovery for three concentration spikes using (a)LC-MS/MS and (b)PSI-MS/MS.  $1/x^2$ -weighted quadratic fit was performed using Analyse-it software (Analyse-it Software Ltd, Leeds, UK).

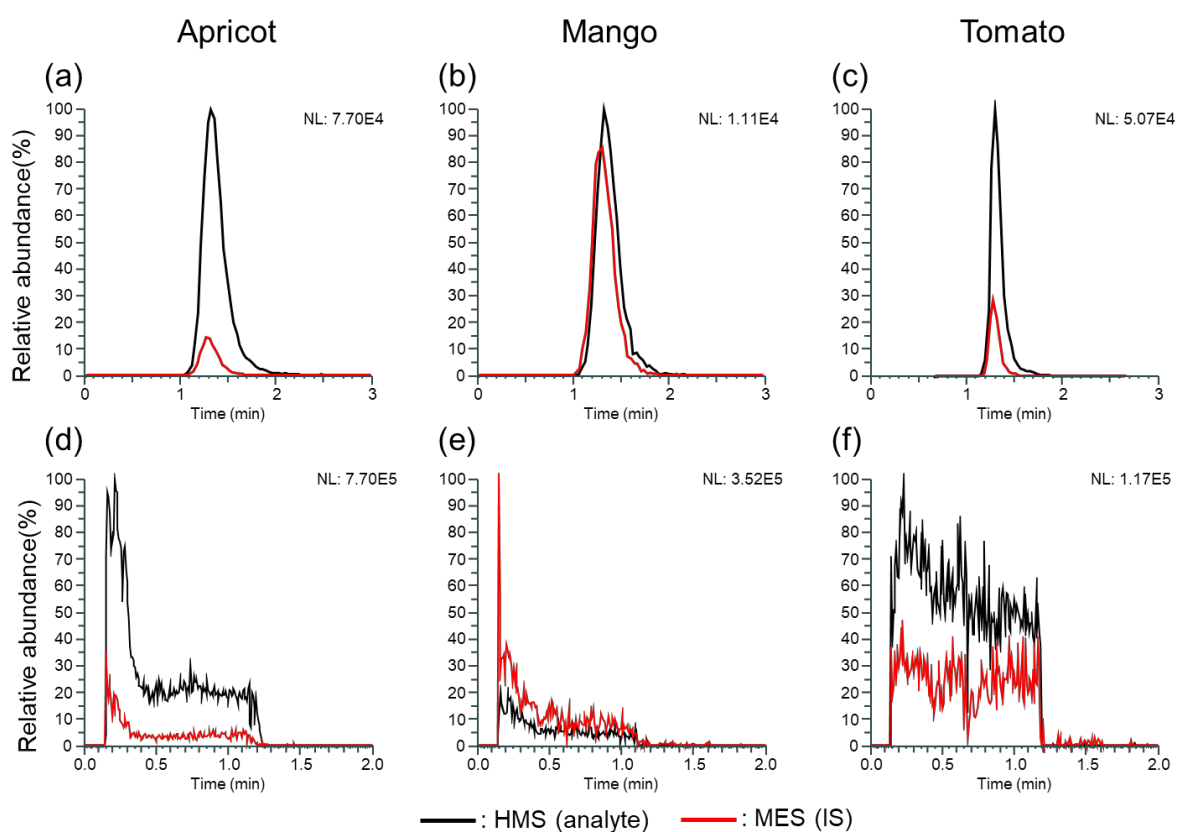

**Figure S3.** Representative (a – c) LC-MS/MS chromatograms and (d – f) PSI-MS/MS chronograms of dried fruit extracts. Dried fruit samples analyzed were (a and d) apricot, (b and e) mango, and (c and f) tomato samples. Black traces were obtained from the transition  $m/z$  111  $\rightarrow$   $m/z$  81 (HMS, analyte) and red traces were obtained from the transition  $m/z$  141  $\rightarrow$   $m/z$  81 (MES, IS). NL denotes normalized level.

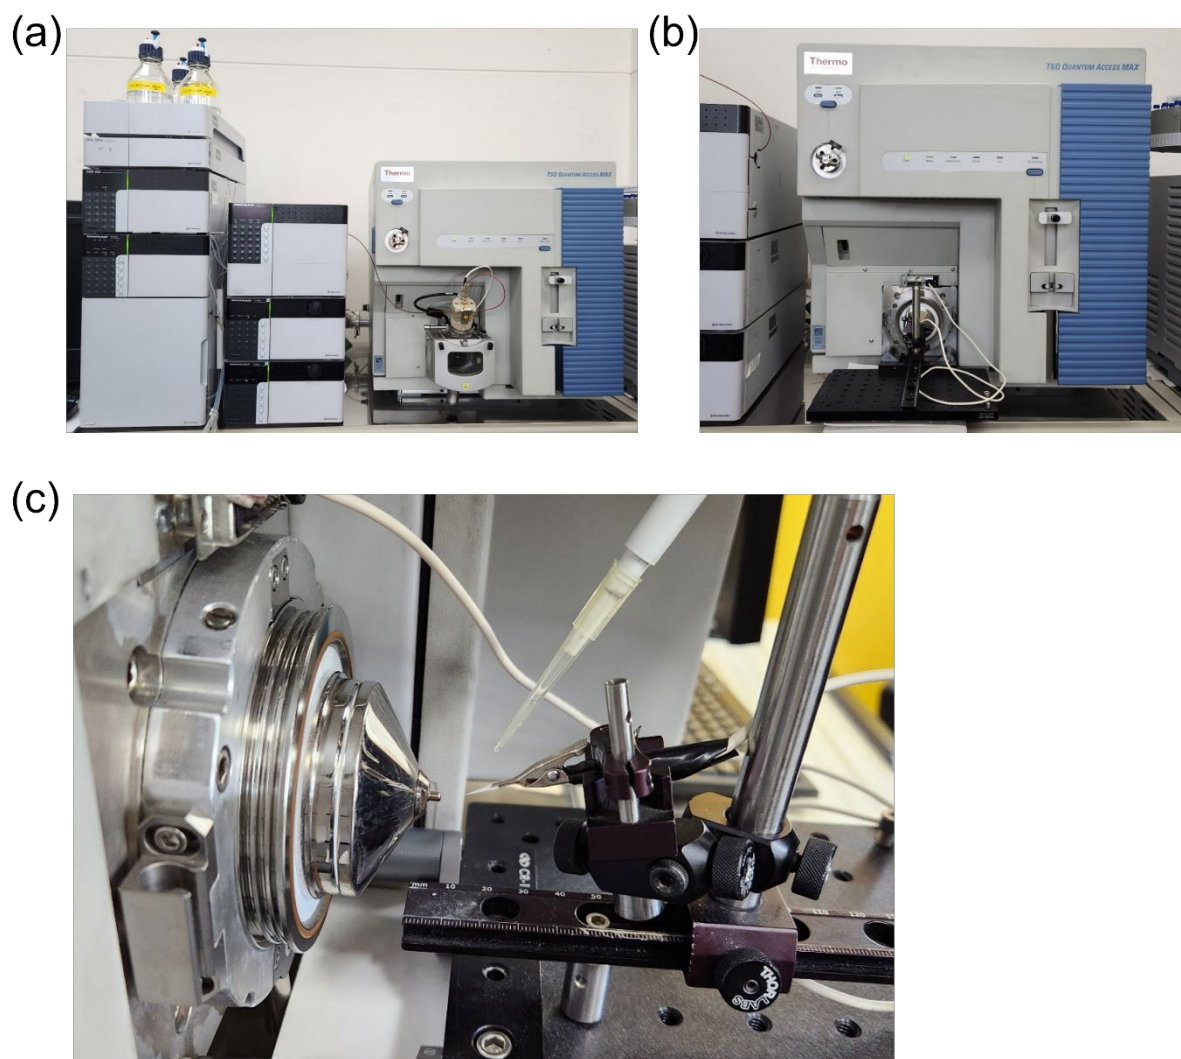

**Figure S4.** Analytical platforms used in this study, (a) LC-MS/MS and (b and c) PSI-MS/MS.

**Table S1.** Detailed results for average percent recovery and percent relative standard deviation (n=3) for three concentration spikes within the dried apricot matrix measured using the LC-MS/MS and PSI-MS/MS.

| <b>LC-MS/MS</b>                                               |                              |                                                                               |                                                           |                             |
|---------------------------------------------------------------|------------------------------|-------------------------------------------------------------------------------|-----------------------------------------------------------|-----------------------------|
| <b>Na<sub>2</sub>SO<sub>3</sub> spike concentration (ppm)</b> | <b>Measured HMS/IS ratio</b> | <b>Concentration determined from the calibration curve<sup>1)</sup> (ppm)</b> | <b>Converted concentration with dilution factor (ppm)</b> | <b>Percent recovery (%)</b> |
| 16                                                            | 0.895                        | 0.302                                                                         | 15.09                                                     | 94.33                       |
|                                                               | 0.841                        | 0.283                                                                         | 14.15                                                     | 88.47                       |
|                                                               | 0.845                        | 0.284                                                                         | 14.22                                                     | 88.89                       |
| Average ± Std. dev.                                           |                              |                                                                               |                                                           | <b>90.56 ± 3.27</b>         |
| 32                                                            | 1.795                        | 0.613                                                                         | 30.64                                                     | 95.77                       |
|                                                               | 1.815                        | 0.620                                                                         | 30.99                                                     | 96.86                       |
|                                                               | 1.932                        | 0.661                                                                         | 33.04                                                     | 103.26                      |
| Average ± Std. dev.                                           |                              |                                                                               |                                                           | <b>98.63 ± 4.05</b>         |
| 80                                                            | 4.584                        | 1.621                                                                         | 81.05                                                     | 101.32                      |
|                                                               | 4.786                        | 1.697                                                                         | 54.85                                                     | 106.07                      |
|                                                               | 4.933                        | 1.753                                                                         | 87.64                                                     | 109.54                      |
| Average ± Std. dev.                                           |                              |                                                                               |                                                           | <b>105.64 ± 4.13</b>        |
| <b>PSI-MS/MS</b>                                              |                              |                                                                               |                                                           |                             |
| <b>Na<sub>2</sub>SO<sub>3</sub> spike concentration (ppm)</b> | <b>Measured HMS/IS ratio</b> | <b>Concentration determined from the calibration curve<sup>2)</sup> (ppm)</b> | <b>Converted concentration with dilution factor (ppm)</b> | <b>Percent recovery (%)</b> |
| 16                                                            | 0.476                        | 0.313                                                                         | 15.67                                                     | 97.94                       |
|                                                               | 0.429                        | 0.280                                                                         | 14.01                                                     | 87.57                       |
|                                                               | 0.391                        | 0.253                                                                         | 12.66                                                     | 79.14                       |
| Average ± Std. dev.                                           |                              |                                                                               |                                                           | <b>88.21 ± 9.42</b>         |
| 32                                                            | 0.834                        | 0.571                                                                         | 28.57                                                     | 89.28                       |
|                                                               | 0.854                        | 0.586                                                                         | 29.30                                                     | 91.56                       |
|                                                               | 0.995                        | 0.689                                                                         | 34.45                                                     | 107.67                      |
| Average ± Std. dev.                                           |                              |                                                                               |                                                           | <b>96.17 ± 10.02</b>        |
| 80                                                            | 2.175                        | 1.603                                                                         | 80.17                                                     | 100.21                      |
|                                                               | 2.374                        | 1.767                                                                         | 88.36                                                     | 110.45                      |
|                                                               | 2.468                        | 1.845                                                                         | 92.27                                                     | 115.34                      |
| Average ± Std. dev.                                           |                              |                                                                               |                                                           | <b>108.67 ± 7.72</b>        |

1) Ratio of HMS / IS = 0.004135 + 2.982 Sulfite Conc. (ppm) - 0.09686 Sulfite Conc. (ppm)<sup>2</sup> (R<sup>2</sup> = 0.999)

2) Ratio of HMS / IS = 0.02715 + 1.453 Sulfite Conc. (ppm) - 0.07076 Sulfite Conc. (ppm)<sup>2</sup> (R<sup>2</sup> = 0.997)

**Table S2.** Detailed results for sulfite contents (in  $\mu\text{g/g SO}_2$ ) in dried fruits determined by LC-MS/MS and PSI-MS/MS methods.

| <b>LC-MS/MS</b>                                               |                              |                                                                               |                                                                               |
|---------------------------------------------------------------|------------------------------|-------------------------------------------------------------------------------|-------------------------------------------------------------------------------|
| <b>Dried fruit</b>                                            | <b>Measured HMS/IS ratio</b> | <b>Concentration determined from the calibration curve<sup>1)</sup> (ppm)</b> | <b>SO<sub>2</sub> concentration (<math>\mu\text{g/g}</math>)<sup>3)</sup></b> |
| Apricot                                                       | 7.713                        | 3.402                                                                         | 432.05                                                                        |
|                                                               | 8.490                        | 3.798                                                                         | 482.24                                                                        |
|                                                               | 8.388                        | 3.745                                                                         | 475.54                                                                        |
| Average $\pm$ Std. dev.: <b>463.27 <math>\pm</math> 27.25</b> |                              |                                                                               |                                                                               |
| Mango                                                         | 1.126                        | 0.437                                                                         | 55.44                                                                         |
|                                                               | 1.178                        | 0.458                                                                         | 58.14                                                                         |
|                                                               | 1.069                        | 0.414                                                                         | 52.51                                                                         |
| Average $\pm$ Std. dev.: <b>55.36 <math>\pm</math> 2.82</b>   |                              |                                                                               |                                                                               |
| Tomato                                                        | 4.083                        | 1.695                                                                         | 215.24                                                                        |
|                                                               | 4.247                        | 1.768                                                                         | 224.48                                                                        |
|                                                               | 4.370                        | 1.823                                                                         | 231.45                                                                        |
| Average $\pm$ Std. dev.: <b>223.72 <math>\pm</math> 8.13</b>  |                              |                                                                               |                                                                               |
| <b>PSI-MS/MS</b>                                              |                              |                                                                               |                                                                               |
| <b>Dried fruit</b>                                            | <b>Measured HMS/IS ratio</b> | <b>Concentration determined from the calibration curve<sup>2)</sup> (ppm)</b> | <b>SO<sub>2</sub> concentration (<math>\mu\text{g/g}</math>)</b>              |
| Apricot                                                       | 5.004                        | 3.745                                                                         | 475.56                                                                        |
|                                                               | 5.422                        | 4.162                                                                         | 528.54                                                                        |
|                                                               | 4.719                        | 3.475                                                                         | 441.23                                                                        |
| Average $\pm$ Std. dev.: <b>481.78 <math>\pm</math> 43.99</b> |                              |                                                                               |                                                                               |
| Mango                                                         | 0.542                        | 0.311                                                                         | 39.5                                                                          |
|                                                               | 0.527                        | 0.301                                                                         | 38.24                                                                         |
|                                                               | 0.666                        | 0.390                                                                         | 49.54                                                                         |
| Average $\pm$ Std. dev.: <b>42.43 <math>\pm</math> 6.19</b>   |                              |                                                                               |                                                                               |
| Tomato                                                        | 2.522                        | 1.668                                                                         | 211.78                                                                        |
|                                                               | 2.487                        | 1.641                                                                         | 208.42                                                                        |
|                                                               | 2.606                        | 1.730                                                                         | 219.64                                                                        |
| Average $\pm$ Std. dev.: <b>213.28 <math>\pm</math> 5.76</b>  |                              |                                                                               |                                                                               |

1) Ratio of HMS / IS = 0.0433 + 2.512 Sulfite Conc. (ppm) - 0.07578 Sulfite Conc. (ppm)<sup>2</sup> ( $R^2 = 0.999$ )

2) Ratio of HMS / IS = 0.04839 + 1.612 Sulfite Conc. (ppm) - 0.07709 Sulfite Conc. (ppm)<sup>2</sup> ( $R^2 = 0.997$ )

3)  $\text{SO}_2$  conc. ( $\mu\text{g/g}$ ) =

$$\text{Na}_2\text{SO}_3 \text{ conc. } (\mu\text{g/mL}) \times \frac{\text{Extract volume (10 mL)}}{\text{Fruit sample amount (1.0 g)}} \times \left( \frac{1000 \mu\text{L sample solution}}{200 \mu\text{L extract}} \right) \times df (5) \times \left( \frac{64 \text{ g/mol SO}_2}{126 \text{ g/mol Na}_2\text{SO}_3} \right)$$

-  $\text{Na}_2\text{SO}_3$  conc.: determined concentration from the calibration curve

-  $\left( \frac{1000 \mu\text{L sample solution}}{200 \mu\text{L extract}} \right)$ : 200  $\mu\text{L}$  of extract was mixed with 100  $\mu\text{L}$  of IS and 700  $\mu\text{L}$  of ACN for MS analysis.

-  $df$ : dilution factor if extract was further diluted in order for the HMS/IS ratio to fall within a calibration range. Since dried fruit extract was further diluted five times,  $df$  of 5 was applied in this case.

-  $\left( \frac{64 \text{ g/mol SO}_2}{126 \text{ g/mol Na}_2\text{SO}_3} \right)$ : conversion term from  $\text{Na}_2\text{SO}_3$  concentration to  $\text{SO}_2$  concentration
